# Supplementary material
Source: MDPI journal article supplement (https://www.mdpi.com/2304-6740/11/10/392)
Supplement: s1 [file s1]

## Supplementary Information

Novel sulfone 2-aminobenzimidazole derivatives and their coordination compounds. Contribution of the ethyl and phenyl substituents on non-covalent molecular interactions. Biological antiproliferative activity.

David Colorado-Solís, Rodrigo Castro-Ramírez, Francisco Sánchez-Bartéz, Isabel Gracia-Mora and Norah Barba-Behrens\*.

Table S1. Representative vibrations and intensities for the ligands sfabz and seabz and their coordination compounds

| Compound                                            | $\nu_{\text{as}}(\text{NH}_2)$ $\text{cm}^{-1}$<br>intensity | $\nu_{\text{s}}(\text{NH}_2)$ $\text{cm}^{-1}$<br>intensity | $\nu(\text{C}=\text{C})+\delta_{\text{sc}}(\text{NH}_2)$<br>+ $\nu(\text{C}-\text{N})$ $\text{cm}^{-1}$<br>intensity | $\nu(\text{C}=\text{N})+\rho(\text{NH}_2)$<br>+ $\nu(\text{C}-\text{N})$ $\text{cm}^{-1}$<br>intensity | $\nu_{\text{as}}(\text{SO}_2)$ $\text{cm}^{-1}$<br>intensity | $\nu_{\text{s}}(\text{SO}_2)$ $\text{cm}^{-1}$<br>intensity |
|-----------------------------------------------------|--------------------------------------------------------------|-------------------------------------------------------------|----------------------------------------------------------------------------------------------------------------------|--------------------------------------------------------------------------------------------------------|--------------------------------------------------------------|-------------------------------------------------------------|
| sfabz                                               | 3434<br><b>very strong</b>                                   | 3341<br><b>weak</b>                                         | 1664<br><b>very strong</b>                                                                                           | 1552<br><b>very strong</b>                                                                             | 1286<br><b>strong</b>                                        | 1140<br><b>strong</b>                                       |
| seabz                                               | 3460<br><b>very strong</b>                                   | 3373<br><b>very strong</b>                                  | 1639<br><b>very strong</b>                                                                                           | 1549<br><b>very strong</b>                                                                             | 1281<br><b>strong</b>                                        | 1132<br><b>strong</b>                                       |
| [Ni(sfabz) <sub>2</sub> Cl <sub>2</sub> ] <b>1</b>  | 3387<br><b>strong</b>                                        | 3305<br><b>strong</b>                                       | 1645<br><b>very strong</b>                                                                                           | 1552<br><b>very strong</b>                                                                             | 1292<br><b>strong</b>                                        | 1141<br><b>strong</b>                                       |
| [Ni(sfabz) <sub>2</sub> Br <sub>2</sub> ] <b>2</b>  | 3418<br><b>strong</b>                                        | 3307<br><b>strong</b>                                       | 1643<br><b>strong</b>                                                                                                | 1549<br><b>very strong</b>                                                                             | 1290<br><b>very strong</b>                                   | 1146<br><b>very strong</b>                                  |
| [Ni(seabz) <sub>2</sub> Cl <sub>2</sub> ] <b>3</b>  | 3407<br><b>medium</b>                                        | 3321<br><b>strong</b>                                       | 1646<br><b>very strong</b>                                                                                           | 1559<br><b>strong</b>                                                                                  | 1295<br><b>strong</b>                                        | 1128<br><b>strong</b>                                       |
| [Ni(seabz) <sub>2</sub> Br <sub>2</sub> ] <b>4</b>  | 3387<br><b>very strong</b>                                   | 3311<br><b>very strong</b>                                  | 1645<br><b>very strong</b>                                                                                           | 1550<br><b>very strong</b>                                                                             | 1294<br><b>very strong</b>                                   | 1126<br><b>strong</b>                                       |
| [Cu(sfabz) <sub>2</sub> Cl <sub>2</sub> ] <b>5</b>  | 3440<br><b>medium</b>                                        | 3372<br><b>medium</b>                                       | 1638<br><b>strong</b>                                                                                                | 1546<br><b>medium</b>                                                                                  | 1289<br><b>strong</b>                                        | 1138<br><b>strong</b>                                       |
| [Cu(sfabz) <sub>2</sub> Br <sub>2</sub> ] <b>6</b>  | 3525<br><b>medium</b>                                        | 3318<br><b>strong</b>                                       | 1643<br><b>strong</b>                                                                                                | 1557<br><b>medium</b>                                                                                  | 1294<br><b>strong</b>                                        | 1141<br><b>very strong</b>                                  |
| [Cu(seabz) <sub>2</sub> Cl <sub>2</sub> ] <b>7</b>  | 3397<br><b>medium</b>                                        | 3308<br><b>medium</b>                                       | 1645<br><b>very strong</b>                                                                                           | 1558<br><b>strong</b>                                                                                  | 1294<br><b>strong</b>                                        | 1125<br><b>strong</b>                                       |
| [Cu(seabz) <sub>2</sub> Br <sub>2</sub> ] <b>8</b>  | 3388<br><b>medium</b>                                        | 3321<br><b>medium</b>                                       | 1639<br><b>very strong</b>                                                                                           | 1549<br><b>strong</b>                                                                                  | 1289<br><b>strong</b>                                        | 1123<br><b>strong</b>                                       |
| [Zn(sfabz) <sub>2</sub> Cl <sub>2</sub> ] <b>9</b>  | 3390<br><b>medium</b>                                        | 3315<br><b>medium</b>                                       | 1646<br><b>very strong</b>                                                                                           | 1556<br><b>very strong</b>                                                                             | 1293<br><b>strong</b>                                        | 1142<br><b>strong</b>                                       |
| [Zn(sfabz) <sub>2</sub> Br <sub>2</sub> ] <b>10</b> | 3415<br><b>medium</b>                                        | 3312<br><b>medium</b>                                       | 1627<br><b>strong</b>                                                                                                | 1152<br><b>very strong</b>                                                                             | 1290<br><b>very strong</b>                                   | 1136<br><b>very strong</b>                                  |
| [Zn(seabz) <sub>2</sub> Cl <sub>2</sub> ] <b>11</b> | 3411<br><b>medium</b>                                        | 3328<br><b>medium</b>                                       | 1650<br><b>very strong</b>                                                                                           | 1562<br><b>strong</b>                                                                                  | 1295<br><b>strong</b>                                        | 1128<br><b>strong</b>                                       |
| [Zn(seabz) <sub>2</sub> Br <sub>2</sub> ] <b>12</b> | 3400<br><b>strong</b>                                        | 3330<br><b>medium</b>                                       | 1640<br><b>very strong</b>                                                                                           | 1550<br><b>very strong</b>                                                                             | 1290<br><b>very strong</b>                                   | 1124<br><b>very strong</b>                                  |
| [Cd(sfabz) <sub>2</sub> Cl <sub>2</sub> ] <b>13</b> | 3419<br><b>medium</b>                                        | 3356<br><b>strong</b>                                       | 1655<br><b>very strong</b>                                                                                           | 1568<br><b>strong</b>                                                                                  | 1289<br><b>strong</b>                                        | 1144<br><b>very strong</b>                                  |
| [Cd(seabz) <sub>2</sub> Cl <sub>2</sub> ] <b>14</b> | 3400<br><b>medium</b>                                        | 3332<br><b>strong</b>                                       | 1648<br><b>very strong</b>                                                                                           | 1558<br><b>very strong</b>                                                                             | 1295<br><b>very strong</b>                                   | 1127<br><b>strong</b>                                       |
| [Hg(sfabz) <sub>2</sub> Cl <sub>2</sub> ] <b>15</b> | 3387<br><b>medium</b>                                        | 3311<br><b>strong</b>                                       | 1645<br><b>very strong</b>                                                                                           | 1552<br><b>strong</b>                                                                                  | 1292<br><b>very strong</b>                                   | 1141<br><b>very strong</b>                                  |
| [Hg(seabz) <sub>2</sub> Cl <sub>2</sub> ] <b>16</b> | 3403<br><b>medium</b>                                        | 3331<br><b>medium</b>                                       | 1647<br><b>very strong</b>                                                                                           | 1559<br><b>strong</b>                                                                                  | 1295<br><b>strong</b>                                        | 1125<br><b>strong</b>                                       |

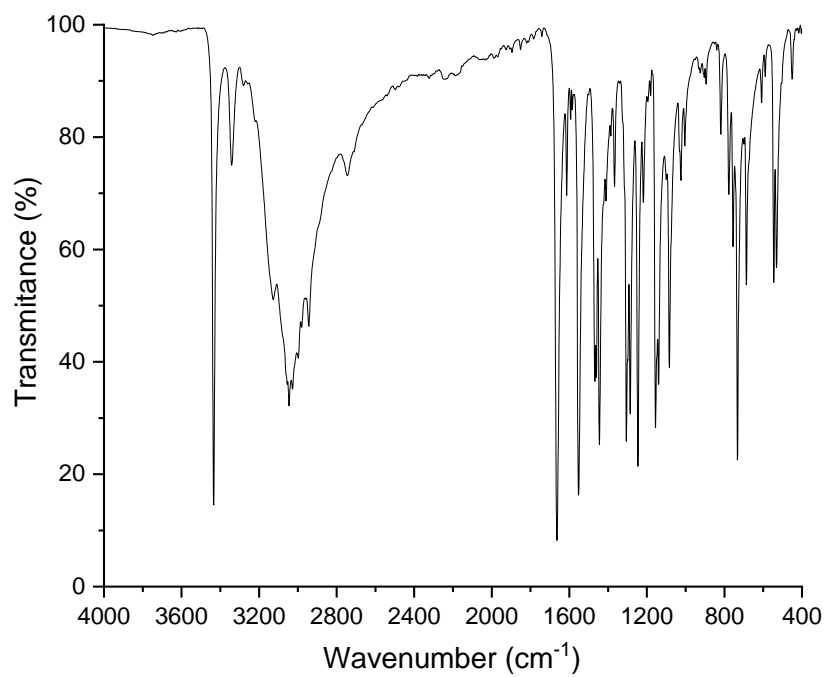

Figure S1. IR spectrum of sfabz.

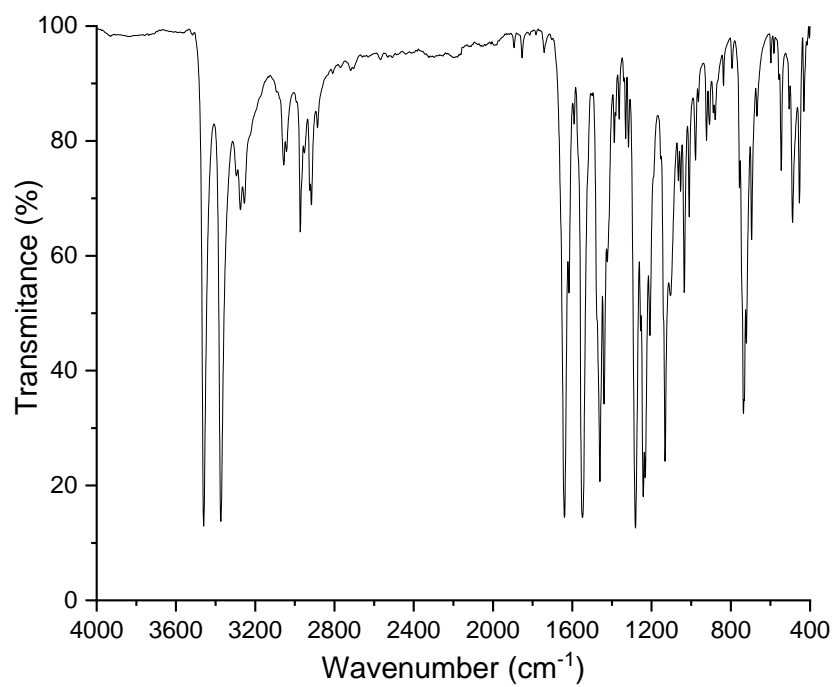

Figure S2. IR spectrum of seabz.

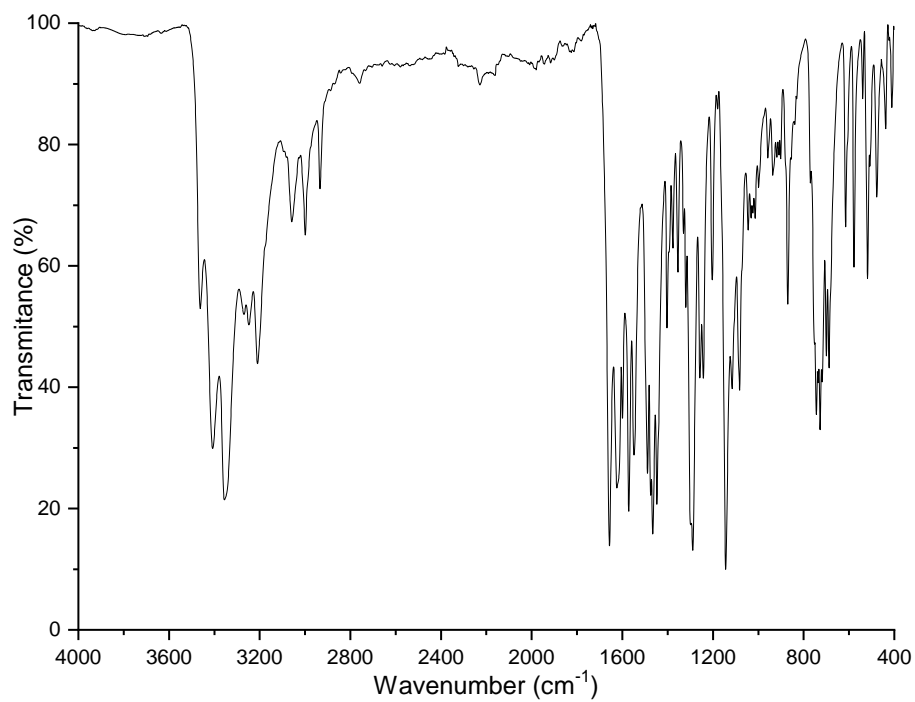

Figure S3. IR spectrum of [Hg(sfabz)<sub>2</sub>Cl<sub>2</sub>].

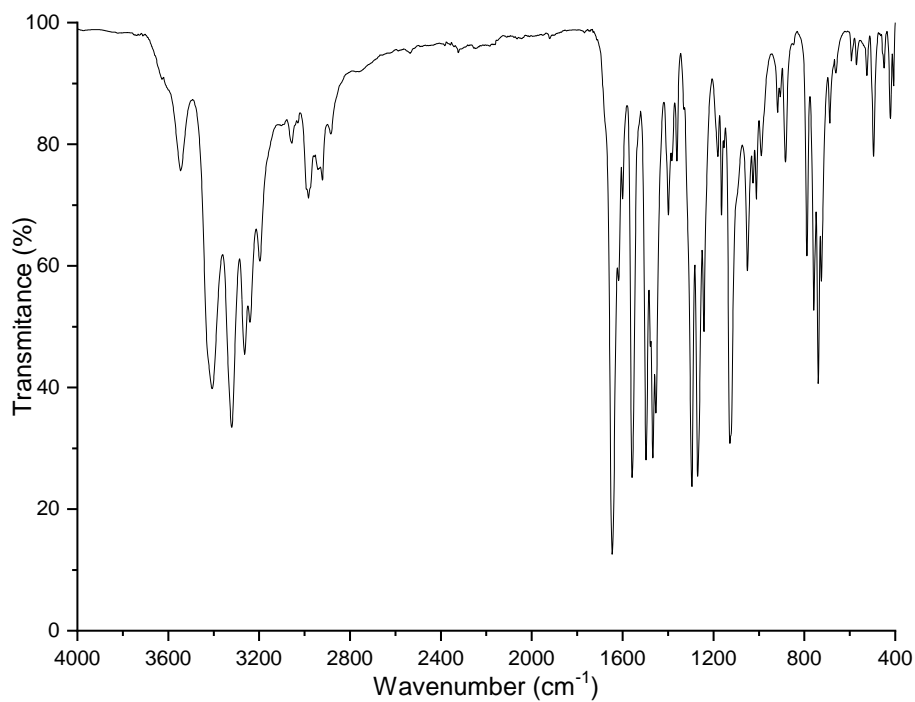

Figure S4. IR spectrum of [Ni(seabz)<sub>2</sub>Cl<sub>2</sub>].

Table S2. Crystallographic data of sfabz, seabz and compound 1.

| Compounds                                                       | <i>sfabz</i>                                                    | <i>seabz</i>                                                    | <i>1</i>                                                                                       |
|-----------------------------------------------------------------|-----------------------------------------------------------------|-----------------------------------------------------------------|------------------------------------------------------------------------------------------------|
| Chemical formula                                                | C <sub>15</sub> H <sub>15</sub> N <sub>3</sub> O <sub>2</sub> S | C <sub>11</sub> H <sub>15</sub> N <sub>3</sub> O <sub>2</sub> S | NiC <sub>30</sub> H <sub>30</sub> N <sub>6</sub> O <sub>4</sub> S <sub>2</sub> Cl <sub>2</sub> |
| Formula weight (g mol <sup>-1</sup> )                           | 301.36                                                          | 253.32                                                          | 732.33                                                                                         |
| Crystal size (mm)                                               | 0.5x0.09x0.01                                                   | 0.48x0.21x0.19                                                  | 0.39x0.18x0.07                                                                                 |
| Crystal color                                                   | Colourless                                                      | Colourless                                                      | Blue                                                                                           |
| Crystal system                                                  | Monoclinic                                                      | Monoclinic                                                      | Triclinic                                                                                      |
| Space group                                                     | P 21/n                                                          | P 21/n                                                          | P-1                                                                                            |
| <i>a</i> (Å)                                                    | 9.9313(12)                                                      | 5.6408(8)                                                       | 9.5656(13)                                                                                     |
| <i>b</i> (Å)                                                    | 5.4217(5)                                                       | 18.453(3)                                                       | 9.9837(9)                                                                                      |
| <i>c</i> (Å)                                                    | 26.904(3)                                                       | 11.1532(15)                                                     | 17.3370(19)                                                                                    |
| $\alpha$ (°)                                                    | 90                                                              | 90                                                              | 83.852(9)                                                                                      |
| $\beta$ (°)                                                     | 99.497(12)                                                      | 97.747(13)                                                      | 87.640(10)                                                                                     |
| $\gamma$ (°)                                                    | 90                                                              | 90                                                              | 78.220(10)                                                                                     |
| <i>V</i> (Å <sup>3</sup> )                                      | 1428.8(3)                                                       | 1150.3(3)                                                       | 1611.2(3)                                                                                      |
| <i>Z</i>                                                        | 4                                                               | 4                                                               | 2                                                                                              |
| <i>D</i> <sub>calc</sub> (mg cm <sup>-3</sup> )                 | 1.401                                                           | 1.463                                                           | 1.51                                                                                           |
| $\mu$ (mm <sup>-1</sup> )                                       | 0.235                                                           | 0.275                                                           | 0.944                                                                                          |
| <i>F</i> (000)                                                  | 632                                                             | 536                                                             | 756                                                                                            |
| Temp. (K)                                                       | 130(2)                                                          | 130(2)                                                          | 130(2)                                                                                         |
| $\theta$ range (°) data collection                              | 3.836-29.631                                                    | 3.687-29.73                                                     | 3.417-29.598                                                                                   |
| Index range                                                     |                                                                 |                                                                 |                                                                                                |
| <i>h</i>                                                        | -13-13                                                          | -6-7                                                            | -12-13                                                                                         |
| <i>k</i>                                                        | -7-7                                                            | -25-25                                                          | -13-13                                                                                         |
| <i>l</i>                                                        | -35-35                                                          | -15-14                                                          | -22-23                                                                                         |
| Measured reflections                                            | 18416                                                           | 6496                                                            | 21425                                                                                          |
| Independent reflections                                         | 3697                                                            | 2754                                                            | 7779                                                                                           |
| Reflections <i>observed</i>                                     | 2836                                                            | 1922                                                            | 5740                                                                                           |
| $[I > 2\sigma(I)]$                                              |                                                                 |                                                                 |                                                                                                |
| <i>R</i> <sub>int</sub>                                         | 0.0494                                                          | 0.0629                                                          | 0.0627                                                                                         |
| Parameters                                                      | 196                                                             | 155                                                             | 406                                                                                            |
| <i>R</i> [ <i>F</i> <sup>2</sup> > 2σ( <i>F</i> <sup>2</sup> )] | 0.0445                                                          | 0.0527                                                          | 0.0549                                                                                         |
| <i>wR</i> <sub>2</sub> ( <i>F</i> <sup>2</sup> )                | 0.102                                                           | 0.1255                                                          | 0.1495                                                                                         |
| <i>S</i>                                                        | 1.068                                                           | 1.078                                                           | 1.072                                                                                          |
| ( $\Delta/\sigma$ ) <sub>max</sub>                              | 0.001                                                           | 0                                                               | 0.001                                                                                          |
| $\Delta\rho_{max}$ (eÅ <sup>-3</sup> )                          | 0.403                                                           | 0.424                                                           | 1.024                                                                                          |
| $\Delta\rho_{min}$ (eÅ <sup>-3</sup> )                          | -0.454                                                          | -0.593                                                          | -0.514                                                                                         |

Table S3. Crystallographic data of 2, 3 and 5.

| Compounds                                       | 2                                                                                                             | 3                                                                                              | 5                                                                                              |
|-------------------------------------------------|---------------------------------------------------------------------------------------------------------------|------------------------------------------------------------------------------------------------|------------------------------------------------------------------------------------------------|
| <i>Chemical formula</i>                         | Ni <sub>2</sub> C <sub>63</sub> H <sub>64</sub> N <sub>12</sub> O <sub>9</sub> S <sub>4</sub> Br <sub>4</sub> | NiC <sub>22</sub> H <sub>30</sub> N <sub>6</sub> O <sub>4</sub> S <sub>2</sub> Cl <sub>2</sub> | CuC <sub>30</sub> H <sub>30</sub> N <sub>6</sub> O <sub>4</sub> S <sub>2</sub> Cl <sub>2</sub> |
| <i>Formula weight (g mol<sup>-1</sup>)</i>      | 1698.56                                                                                                       | 636.25                                                                                         | 737.16                                                                                         |
| <i>Crystal size (mm)</i>                        | 0.42x0.38x0.23                                                                                                | 0.49x0.21x0.13                                                                                 | 0.242x0.192x0.089                                                                              |
| <i>Crystal color</i>                            | Dark green                                                                                                    | Blue                                                                                           | Green                                                                                          |
| <i>Crystal system</i>                           | Triclinic                                                                                                     | Monoclinic                                                                                     | Triclinic                                                                                      |
| <i>Space group</i>                              | P-1                                                                                                           | P 21/c                                                                                         | P-1                                                                                            |
| <i>a (Å)</i>                                    | 10.6925(6)                                                                                                    | 16.9816(12)                                                                                    | 10.365(2)                                                                                      |
| <i>b (Å)</i>                                    | 11.1876(6)                                                                                                    | 15.3376(8)                                                                                     | 11.384(2)                                                                                      |
| <i>c (Å)</i>                                    | 14.4961(9)                                                                                                    | 10.2625(7)                                                                                     | 13.918(3)                                                                                      |
| <i>α (°)</i>                                    | 76.685(5)                                                                                                     | 90                                                                                             | 100.833(4)                                                                                     |
| <i>β (°)</i>                                    | 89.622(5)                                                                                                     | 100.987(7)                                                                                     | 94.543(4)                                                                                      |
| <i>γ (°)</i>                                    | 89.579(4)                                                                                                     | 90                                                                                             | 97.599(4)                                                                                      |
| <i>V (Å<sup>3</sup>)</i>                        | 1687.39(17)                                                                                                   | 2623.9(3)                                                                                      | 1589.8(5)                                                                                      |
| <i>Z</i>                                        | 1                                                                                                             | 4                                                                                              | 2                                                                                              |
| <i>D<sub>calc</sub> (mg cm<sup>-3</sup>)</i>    | 1.672                                                                                                         | 1.611                                                                                          | 1.540                                                                                          |
| <i>μ (mm<sup>-1</sup>)</i>                      | 3.115                                                                                                         | 1.145                                                                                          | 1.033                                                                                          |
| <i>F(000)</i>                                   | 858                                                                                                           | 1320                                                                                           | 758                                                                                            |
| <i>Temp. (K)</i>                                | 130(2)                                                                                                        | 130(2)                                                                                         | 298(2)                                                                                         |
| <i>θ range (°) data collection</i>              | 3.452-30.163                                                                                                  | 3.61-29.496                                                                                    | 1.498-26.022                                                                                   |
| <i>Index range</i>                              |                                                                                                               |                                                                                                |                                                                                                |
| <i>h</i>                                        | -14-14                                                                                                        | -16-23                                                                                         | -12-12                                                                                         |
| <i>k</i>                                        | -15-14                                                                                                        | -21-19                                                                                         | -14-14                                                                                         |
| <i>l</i>                                        | -19-20                                                                                                        | -13-10                                                                                         | -17-17                                                                                         |
| <i>Measured reflections</i>                     | 24487                                                                                                         | 13678                                                                                          | 39236                                                                                          |
| <i>Independent reflections</i>                  | 8685                                                                                                          | 6288                                                                                           | 6231                                                                                           |
| <i>Reflections observed</i>                     | 7059                                                                                                          | 4365                                                                                           | 3167                                                                                           |
| <i>[I&gt;2σ(I)]</i>                             |                                                                                                               |                                                                                                |                                                                                                |
| <i>R<sub>int</sub></i>                          | 0.032                                                                                                         | 0.0518                                                                                         | 0.1178                                                                                         |
| <i>Parameters</i>                               | 433                                                                                                           | 336                                                                                            | 620                                                                                            |
| <i>R [F<sup>2</sup> &gt; 2σ(F<sup>2</sup>)]</i> | 0.0334                                                                                                        | 0.0486                                                                                         | 0.0682                                                                                         |
| <i>wR<sub>2</sub> (F<sup>2</sup>)</i>           | 0.0781                                                                                                        | 0.1035                                                                                         | 0.1744                                                                                         |
| <i>S</i>                                        | 1.034                                                                                                         | 1.048                                                                                          | 0.96                                                                                           |
| <i>(Δ/σ)<sub>max</sub></i>                      | 0.002                                                                                                         | 0.001                                                                                          | 0                                                                                              |
| <i>Δρ<sub>max</sub> (eÅ<sup>-3</sup>)</i>       | 0.567                                                                                                         | 0.592                                                                                          | 0.501                                                                                          |
| <i>Δρ<sub>min</sub> (eÅ<sup>-3</sup>)</i>       | -0.593                                                                                                        | -0.501                                                                                         | -0.0435                                                                                        |

Table S4. Crystallographic data of 9 and 10.

| <i>Compounds</i>                                | <i>9</i>                                                                                       | <i>10</i>                                                                                      |
|-------------------------------------------------|------------------------------------------------------------------------------------------------|------------------------------------------------------------------------------------------------|
| <i>Chemical formula</i>                         | ZnC <sub>30</sub> H <sub>30</sub> N <sub>6</sub> O <sub>4</sub> S <sub>2</sub> Cl <sub>2</sub> | ZnC <sub>32</sub> H <sub>32</sub> N <sub>6</sub> O <sub>5</sub> S <sub>2</sub> Br <sub>2</sub> |
| <i>Formula weight (g mol<sup>-1</sup>)</i>      | 738.99                                                                                         | 869.94                                                                                         |
| <i>Crystal size (mm)</i>                        | 0.433x0.248x0.070                                                                              | 0.28x0.25x0.19                                                                                 |
| <i>Crystal color</i>                            | colourless                                                                                     | Colourless                                                                                     |
| <i>Crystal system</i>                           | Triclinic                                                                                      | Triclinic                                                                                      |
| <i>Space group</i>                              | P-1                                                                                            | P-1                                                                                            |
| <i>a (Å)</i>                                    | 10.367(11)                                                                                     | 10.6872(5)                                                                                     |
| <i>b (Å)</i>                                    | 10.928(12)                                                                                     | 11.2000(5)                                                                                     |
| <i>c (Å)</i>                                    | 14.556(15)                                                                                     | 14.5708(7)                                                                                     |
| <i>α (°)</i>                                    | 78.18(2)                                                                                       | 76.451(4)                                                                                      |
| <i>β (°)</i>                                    | 89.19(2)                                                                                       | 89.503(4)                                                                                      |
| <i>γ (°)</i>                                    | 85.37(2)                                                                                       | 89.511(4)                                                                                      |
| <i>V (Å<sup>3</sup>)</i>                        | 1609(3)                                                                                        | 1695.44(14)                                                                                    |
| <i>Z</i>                                        | 2                                                                                              | 2                                                                                              |
| <i>D<sub>calc</sub> (mg cm<sup>-3</sup>)</i>    | 1.526                                                                                          | 1.704                                                                                          |
| <i>μ (mm<sup>-1</sup>)</i>                      | 1.105                                                                                          | 5.342                                                                                          |
| <i>F(000)</i>                                   | 760                                                                                            | 876                                                                                            |
| <i>Temp. (K)</i>                                | 150(2)                                                                                         | 130(2)                                                                                         |
| <i>θ range (°) data collection</i>              | 2.432-26.414                                                                                   | 4.060-73.656                                                                                   |
| <i>Index range</i>                              |                                                                                                |                                                                                                |
| <i>h</i>                                        | -12-12                                                                                         | -13-13                                                                                         |
| <i>k</i>                                        | -13-13                                                                                         | -13-13                                                                                         |
| <i>l</i>                                        | -18-18                                                                                         | -18-18                                                                                         |
| <i>Measured reflections</i>                     | 33661                                                                                          | 36795                                                                                          |
| <i>Independent reflections</i>                  | 6549                                                                                           | 6720                                                                                           |
| <i>Reflections observed</i>                     | 3903                                                                                           | 5824                                                                                           |
| <i>[I&gt;2σ(I)]</i>                             |                                                                                                |                                                                                                |
| <i>R<sub>int</sub></i>                          | 0.1339                                                                                         | 0.0435                                                                                         |
| <i>Parameters</i>                               | 418                                                                                            | 433                                                                                            |
| <i>R [F<sup>2</sup> &gt; 2σ(F<sup>2</sup>)]</i> | 0.0586                                                                                         | 0.0394                                                                                         |
| <i>wR<sub>2</sub> (F<sup>2</sup>)</i>           | 0.1087                                                                                         | 0.1106                                                                                         |
| <i>S</i>                                        | 1.022                                                                                          | 1.081                                                                                          |
| <i>(Δ/σ)<sub>max</sub></i>                      | 0                                                                                              | 0.001                                                                                          |
| <i>Δρ<sub>max</sub> (eÅ<sup>-3</sup>)</i>       | 0.449                                                                                          | 0.637                                                                                          |
| <i>Δρ<sub>min</sub> (eÅ<sup>-3</sup>)</i>       | -0.619                                                                                         | -1.329                                                                                         |

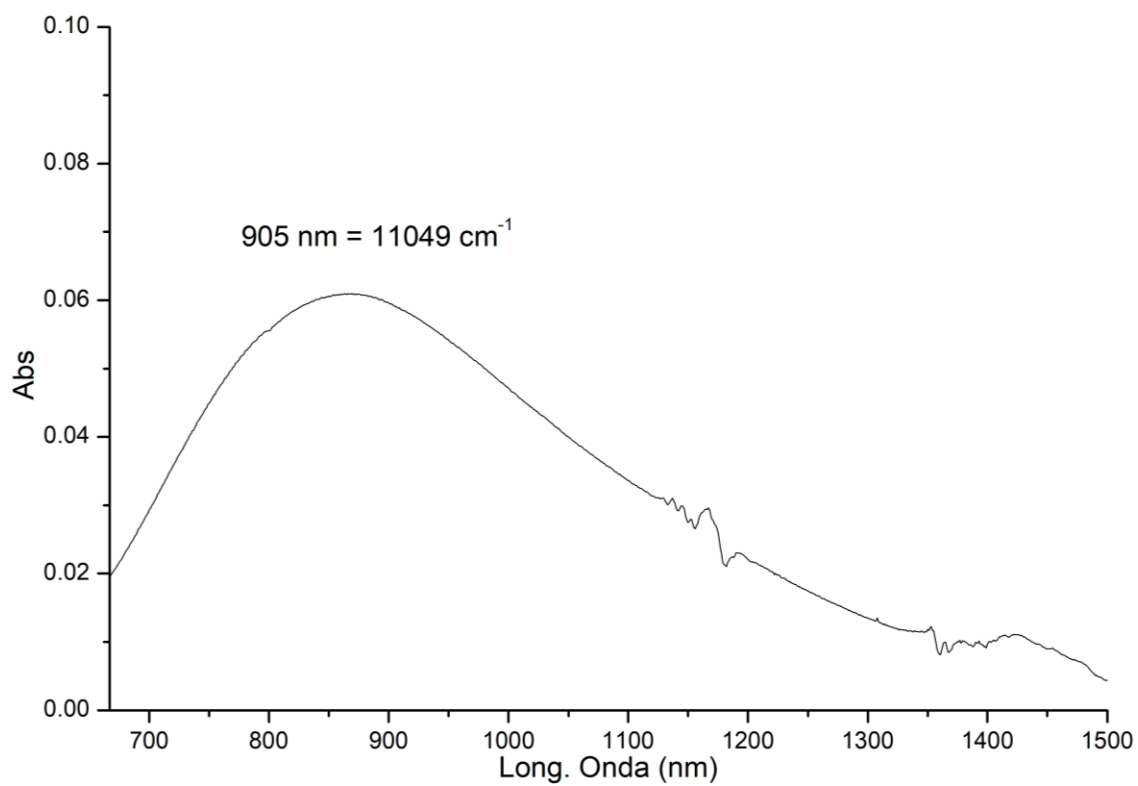

Figure S5. Solution spectrum of  $[\text{Cu}(\text{sfabz})_2\text{Cl}_2]$  in DMSO,  $1 \times 10^{-3}$  M.

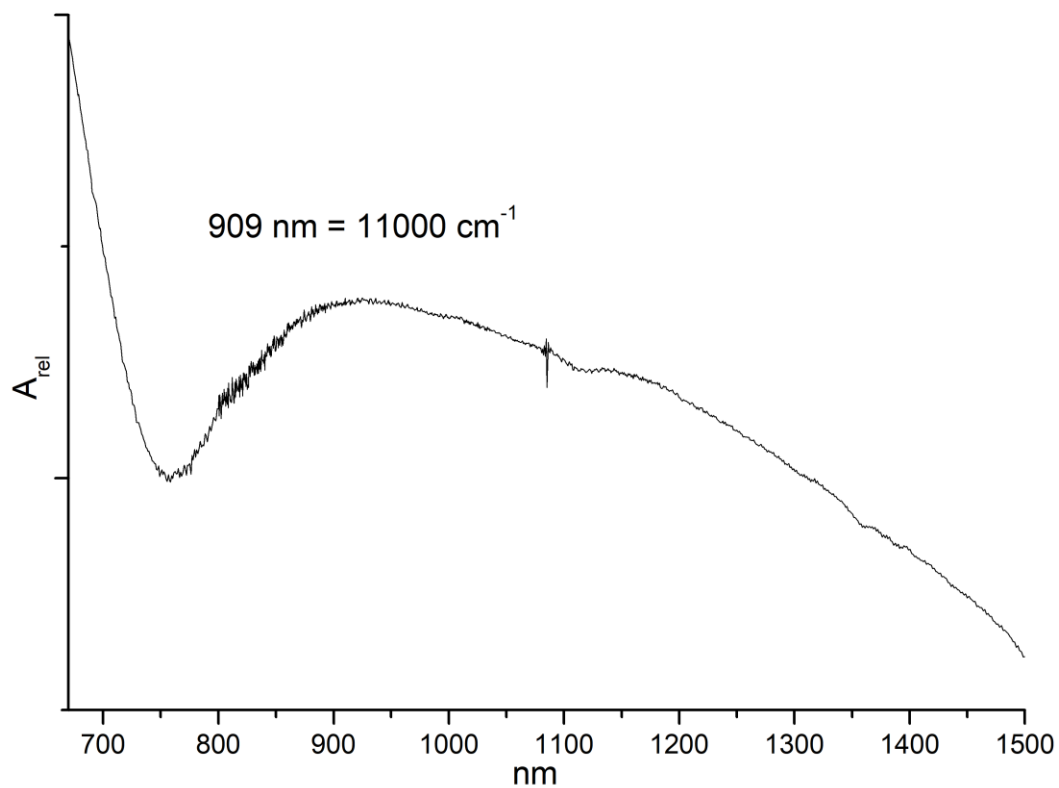

Figure S6. Diffuse reflectance spectrum of  $[\text{Cu}(\text{sfabz})_2\text{Cl}_2]$ .

Table S5. <sup>1</sup>H-NMR for sfabz and its coordination compounds (DMSO d<sup>6</sup>).

| <i>Signal</i> | <i>sfabz</i>        | <i>[Zn(sfabz)<sub>2</sub>Cl<sub>2</sub>]</i><br>(9) | <i>[Zn(sfabz)<sub>2</sub>Br<sub>2</sub>]</i><br>(10) | <i>[Cd(sfabz)<sub>2</sub>Cl<sub>2</sub>]</i><br>(13) | <i>[Hg(sfabz)<sub>2</sub>Cl<sub>2</sub>]</i><br>(15) |
|---------------|---------------------|-----------------------------------------------------|------------------------------------------------------|------------------------------------------------------|------------------------------------------------------|
| 4             | 7.05 ppm (d)        | 7.21 ppm (s, broad)                                 | 7.23 ppm (d)                                         | 7.22 ppm (d)                                         | 7.22 ppm (d)                                         |
| 5             | 6.89 ppm (t)        | 6.94 ppm (m)                                        | 6.94 ppm (t)                                         | 6.92 ppm (t)                                         | 6.98 ppm (m)                                         |
| 6             | 6.79 ppm (t)        | 6.92 ppm (m)                                        | 6.92 ppm (m)                                         | 6.85 ppm (t)                                         | 6.94 ppm (m)                                         |
| 7             | 6.74 ppm (d)        | 6.92 ppm (m)                                        | 6.92 ppm (m)                                         | 6.82 ppm (d)                                         | 6.94 ppm (m)                                         |
| 10 (2H)       | 6.43 ppm (s, broad) | 7.21 ppm (s, broad)                                 | 7.10 ppm (s, broad)                                  | 6.75 ppm (s, broad)                                  | 7.12 ppm (s, broad)                                  |
| 11 (2H)       | 4.28 ppm (t)        | 4.40 ppm (t)                                        | 4.40 ppm (t)                                         | 4.32 ppm (t)                                         | 4.39 ppm (t)                                         |
| 12 (2H)       | 3.72 ppm (t)        | 3.81 ppm (t)                                        | 3.81 ppm (t)                                         | 3.74 ppm (t)                                         | 3.81 ppm (t)                                         |
| 17 (2H)       | 7.86 ppm (d)        | 7.84 ppm (m)                                        | 7.84 ppm (d)                                         | 7.85 ppm (d)                                         | 7.85 ppm (d)                                         |
| 18 (2H)       | 7.58 ppm (t)        | 7.55 ppm (m)                                        | 7.56 ppm (t)                                         | 7.58 ppm (t)                                         | 7.52 ppm (t)                                         |
| 19            | 7.71 ppm (t)        | 7.67 ppm (m)                                        | 7.68 ppm (t)                                         | 7.69 ppm (t)                                         | 7.63 ppm (t)                                         |

Table S6. <sup>13</sup>C-NMR for sfabz and its coordination compounds (DMSO d<sup>6</sup>).

| <i>Signal</i> | <i>sfabz</i> | <i>[Zn(sfabz)<sub>2</sub>Cl<sub>2</sub>]</i><br>(9) | <i>[Zn(sfabz)<sub>2</sub>Br<sub>2</sub>]</i><br>(10) | <i>[Cd(sfabz)<sub>2</sub>Cl<sub>2</sub>]</i><br>(13) | <i>[Hg(sfabz)<sub>2</sub>Cl<sub>2</sub>]</i><br>(15) |
|---------------|--------------|-----------------------------------------------------|------------------------------------------------------|------------------------------------------------------|------------------------------------------------------|
| 2             | 154.82 ppm   | 154.92 ppm                                          | 154.76 ppm                                           | 154.97 ppm                                           | 155.06 ppm                                           |
| 4             | 115.27 ppm   | 114.62 ppm                                          | 114.81 ppm                                           | 115.43 ppm                                           | 114.36 ppm                                           |
| 5             | 121.10 ppm   | 122.24 ppm                                          | 122.16 ppm                                           | 121.54 ppm                                           | 122.21 ppm                                           |
| 6             | 118.66 ppm   | 120.62 ppm                                          | 120.55 ppm                                           | 119.62 ppm                                           | 120.57 ppm                                           |
| 7             | 107.73 ppm   | 108.98 ppm                                          | 108.90 ppm                                           | 108.25 ppm                                           | 109.08 ppm                                           |
| 8             | 133.91 ppm   | 132.33 ppm                                          | 132.43 ppm                                           | 133.09 ppm                                           | 132.49 ppm                                           |
| 9             | 142.92 ppm   | 139.08 ppm                                          | 139.10 ppm                                           | 140.91 ppm                                           | 139.29 ppm                                           |
| 11            | 36.08 ppm    | 36.37 ppm                                           | 36.36 ppm                                            | 36.21 ppm                                            | 36.58 ppm                                            |
| 12            | 53.18 ppm    | 52.54 ppm                                           | 52.59 ppm                                            | 52.86 ppm                                            | 52.52 ppm                                            |
| 16            | 136.17 ppm   | 138.70 ppm                                          | 138.87 ppm                                           | 139.10 ppm                                           | 139.05 ppm                                           |
| 17 (2C)       | 127.96 ppm   | 127.80 ppm                                          | 127.83 ppm                                           | 127.91 ppm                                           | 127.73 ppm                                           |
| 18 (2C)       | 129.84 ppm   | 129.83 ppm                                          | 129.86 ppm                                           | 129.88 ppm                                           | 129.78 ppm                                           |
| 19            | 134.44 ppm   | 134.49 ppm                                          | 134.51 ppm                                           | 134.50 ppm                                           | 134.43 ppm                                           |



Table S7. <sup>1</sup>H-NMR for seabz and its coordination compounds (d<sup>6</sup> DMSO).

| Signal  | seabz                     | [Zn(seabz) <sub>2</sub> Cl <sub>2</sub> ]<br>(11) | [Zn(seabz) <sub>2</sub> Br <sub>2</sub> ]<br>(12) | [Cd(seabz) <sub>2</sub> Cl <sub>2</sub> ]<br>(14) | [Hg(seabz) <sub>2</sub> Cl <sub>2</sub> ]<br>(16) |
|---------|---------------------------|---------------------------------------------------|---------------------------------------------------|---------------------------------------------------|---------------------------------------------------|
| 4       | 7.13 ppm (dd, overlapped) | 7.28 ppm (m, overlapped)                          | 7.28 ppm (dd, overlapped)                         | 7.33 ppm (dd)                                     | 7.29 ppm (m, overlapped)                          |
| 5       | 6.88 ppm (td)             | 7.01 ppm (m, overlapped)                          | 6.99 ppm (m, overlapped)                          | 6.98 ppm (m, overlapped)                          | 7.02 ppm (m, overlapped)                          |
| 6       | 6.94 ppm (td)             | 6.99 ppm (m, overlapped)                          | 7.02 ppm (m, overlapped)                          | 6.97 ppm (m, overlapped)                          | 7.02 ppm (m, overlapped)                          |
| 7       | 7.15 ppm (dd, overlapped) | 7.26 ppm (m, overlapped)                          | 7.29 ppm (dd, overlapped)                         | 7.22 ppm (dd)                                     | 7.28 ppm (m, overlapped)                          |
| 10 (2H) | 6.48 ppm (s, broad)       | 7.32 ppm (s, broad)                               | 7.18 ppm (s, broad)                               | 6.86 ppm (s, broad)                               | 7.13 ppm (s, broad)                               |
| 11 (2H) | 4.39 ppm (t)              | 4.49 ppm (t)                                      | 4.49 ppm (t)                                      | 4.42 ppm (t)                                      | 4.46 ppm (t)                                      |
| 12 (2H) | 3.46 ppm (t)              | 3.55 ppm (t)                                      | 3.55 ppm (t)                                      | 3.48 ppm (t)                                      | 3.52 ppm (t)                                      |
| 16 (2H) | 3.08 ppm (q)              | 3.14 ppm (q)                                      | 3.14 ppm (q)                                      | 3.12 ppm (q)                                      | 3.13 ppm (q)                                      |
| 17 (3H) | 1.15 ppm (t)              | 1.17 ppm (t)                                      | 1.17 ppm (t)                                      | 1.16 ppm (t)                                      | 1.16 ppm (t)                                      |

Table S8. <sup>13</sup>C-NMR for seabz and its coordination compounds (d<sup>6</sup> DMSO).

| Signal | seabz      | [Zn(seabz) <sub>2</sub> Cl <sub>2</sub> ]<br>(11) | [Zn(seabz) <sub>2</sub> Br <sub>2</sub> ]<br>(12) | [Cd(seabz) <sub>2</sub> Cl <sub>2</sub> ]<br>(14) | [Hg(seabz) <sub>2</sub> Cl <sub>2</sub> ]<br>(16) |
|--------|------------|---------------------------------------------------|---------------------------------------------------|---------------------------------------------------|---------------------------------------------------|
| 2      | 155.05 ppm | 155.10 ppm                                        | 154.92 ppm                                        | 155.12 ppm                                        | 155.25 ppm                                        |
| 4      | 115.40 ppm | 114.65 ppm                                        | 114.84 ppm                                        | 115.59 ppm                                        | 114.57 ppm                                        |
| 5      | 121.17 ppm | 122.37 ppm                                        | 122.29 ppm                                        | 121.70 ppm                                        | 122.20 ppm                                        |
| 6      | 118.78 ppm | 120.81 ppm                                        | 120.74 ppm                                        | 119.92 ppm                                        | 120.55 ppm                                        |
| 7      | 108.12 ppm | 109.36 ppm                                        | 109.29 ppm                                        | 108.70 ppm                                        | 109.26 ppm                                        |
| 8      | 134.05 ppm | 132.45 ppm                                        | 132.55 ppm                                        | 133.11 ppm                                        | 132.78 ppm                                        |
| 9      | 143.19 ppm | 138.81 ppm                                        | 138.99 ppm                                        | 140.74 ppm                                        | 139.78 ppm                                        |
| 11     | 35.60 ppm  | 35.78 ppm                                         | 35.78 ppm                                         | 35.70 ppm                                         | 35.91 ppm                                         |
| 12     | 49.62 ppm  | 49.04 ppm                                         | 49.07 ppm                                         | 49.30 ppm                                         | 49.16 ppm                                         |
| 16     | 47.29 ppm  | 47.34 ppm                                         | 47.35 ppm                                         | 47.31 ppm                                         | 47.32 ppm                                         |
| 17     | 6.34 ppm   | 6.28 ppm                                          | 6.30 ppm                                          | 6.32 ppm                                          | 6.30 ppm                                          |
